# Supplementary material for: Predicting Drug Release from 3D Printed Oral Medicines Based on the Surface Area to Volume Ratio of Tablet Geometry
Source: MDPI journal article supplement (doi:10.3390/pharmaceutics13091453), 2021-09-11
Supplement: s1 [file s1]

# Supplementary Materials: Predicting Drug Release from 3D Printed Oral Medicines Based on the Surface Area to Volume Ratio of Tablet Geometry

Hellen Windolf, Rebecca Chamberlain and Julian Quodbach \*

Institute of Pharmaceutics and Biopharmaceutics, Heinrich Heine University, Universitätsstr. 1, 40225 Düsseldorf, Germany; hellen.windolf@hhu.de (H.W.); rebecca.chamberlain@hhu.de (R.C.)

\* Correspondence: julian.quodbach@hhu.de; Tel.: +49-211-81-15693

**Table S1.** Physical characterization of the printed tablets for SA/V ratio 1 – 2 mm<sup>-1</sup> (n ≥ 3, x ± s).

| PDM | SA/V | mg Total      | mg API       | h / mm       | l / mm       | w / mm       |
|-----|------|---------------|--------------|--------------|--------------|--------------|
| Q1  | 1    | 706.09 ± 1.07 | 36.78 ± 0.12 | 2.61 ± 0.04  | 15.13 ± 0.04 | 15.13 ± 0.03 |
| Q2  | 1    | 306.10 ± 1.06 | 15.98 ± 0.05 | 3.98 ± 0.02  | 8.12 ± 0.07  | 8.10 ± 0.05  |
| Q3  | 1    | 308.52 ± 1.18 | 16.08 ± 0.02 | 5.02 ± 0.03  | 10.14 ± 0.02 | 5.02 ± 0.06  |
| C   | 1    | 241.41 ± 1.55 | 12.60 ± 0.09 | 4.01 ± 0.01  | 7.99 ± 0.01  | 8.01 ± 0.01  |
| HC  | 1    | 805.42 ± 4.61 | 42.22 ± 0.22 | 10.01 ± 0.02 | 11.00 ± 0.02 | 11.00 ± 0.01 |
| P   | 1    | 319.51 ± 0.72 | 16.67 ± 0.08 | 9.07 ± 0.05  | 8.99 ± 0.02  | 9.04 ± 0.04  |
| PDM | SA/V | mg Total      | mg API       | h / mm       | l / mm       | w / mm       |
| Q1  | 1.5  | 422.56 ± 2.36 | 22.03 ± 0.06 | 1.59 ± 0.05  | 15.16 ± 0.05 | 15.16 ± 0.05 |
| Q2  | 1.5  | 155.65 ± 1.48 | 8.12 ± 0.09  | 1.97 ± 0.02  | 8.10 ± 0.05  | 8.11 ± 0.04  |
| Q3  | 1.5  | 135.64 ± 0.75 | 7.04 ± 0.06  | 2.19 ± 0.02  | 10.14 ± 0.04 | 5.10 ± 0.00  |
| C   | 1.5  | 121.10 ± 0.82 | 6.27 ± 0.03  | 1.98 ± 0.02  | 8.05 ± 0.03  | 7.99 ± 0.01  |
| HC  | 1.5  | 263.57 ± 1.36 | 13.73 ± 0.09 | 4.00 ± 0.02  | 10.03 ± 0.02 | 10.03 ± 0.01 |
| P   | 1.5  | 93.87 ± 0.86  | 4.94 ± 0.05  | 5.9 ± 0.00   | 6.06 ± 0.02  | 6.07 ± 0.02  |
| PDM | SA/V | mg total      | mg API       | h / mm       | l / mm       | w / mm       |
| Q1  | 2    | 293.76 ± 4.75 | 15.24 ± 0.22 | 1.09 ± 0.04  | 15.13 ± 0.06 | 15.15 ± 0.04 |
| Q2  | 2    | 101.99 ± 1.18 | 5.29 ± 0.07  | 1.28 ± 0.02  | 8.13 ± 0.07  | 8.13 ± 0.05  |
| Q3  | 2    | 86.47 ± 0.76  | 4.51 ± 0.02  | 1.4 ± 0.01   | 10.10 ± 0.03 | 5.09 ± 0.03  |
| C   | 2    | 76.69 ± 0.46  | 3.97 ± 0.03  | 1.3 ± 0.01   | 8.02 ± 0.05  | 8.04 ± 0.05  |
| HC  | 2    | 133.45 ± 0.44 | 6.96 ± 0.01  | 1.98 ± 0.02  | 10.05 ± 0.02 | 10.00 ± 0.01 |
| P   | 2    | 38.75 ± 0.22  | 2.02 ± 0.01  | 4.16 ± 0.04  | 4.44 ± 0.05  | 4.48 ± 0.11  |

**Table S2.** Physical characterization of the printed tablets for the correlation generation with the PDM-PVA formulation (n ≥ 3, x ± s).

| PDM                     |               |              |             |              |              |
|-------------------------|---------------|--------------|-------------|--------------|--------------|
| SA/V / mm <sup>-1</sup> | mg Total      | mg API       | h / mm      | l / mm       | w / mm       |
| 0.8                     | 464.36 ± 2.40 | 22.82 ± 0.11 | 8.01 ± 0.00 | 8.01 ± 0.01  | 8.00 ± 0.01  |
| 2.5                     | 90.15 ± 3.00  | 4.54 ± 0.15  | 4.02 ± 0.01 | 7.00 ± 0.02  | 7.00 ± 0.02  |
| 3.33                    | 78.46 ± 0.11  | 4.07 ± 0.02  | 1.01 ± 0.01 | 15.01 ± 0.01 | 15.00 ± 0.01 |
| 4                       | 33.40 ± 0.47  | 1.75 ± 0.03  | 1.01 ± 0.00 | 10.00 ± 0.01 | 10.00 ± 0.00 |
| 5                       | 49.1 ± 0.93   | 2.56 ± 0.05  | 0.67 ± 0.01 | 18.02 ± 0.01 | 18.01 ± 0.01 |
| 6                       | 34.87 ± 1.68  | 1.83 ± 0.09  | 0.49 ± 0.00 | 20.00 ± 0.01 | 20.00 ± 0.01 |

**Table S3.** Physical characterization of the printed tablets for the correlation generation with the LD-EVA formulation (n ≥ 3, x ± s).

| LD                      |                |              |              |              |              |
|-------------------------|----------------|--------------|--------------|--------------|--------------|
| SA/V / mm <sup>-1</sup> | mg Total       | mg API       | h / mm       | l / mm       | w / mm       |
| 0.9                     | 230.80 ± 3.42  | 22.43 ± 0.36 | 4.10 ± 0.06  | 9.90 ± 0.03  | 9.92 ± 0.05  |
| 1.0                     | 174.75 ± 6.33  | 17.48 ± 0.68 | 3.01 ± 0.01  | 10.02 ± 0.02 | 10.01 ± 0.01 |
| 1.5                     | 204.33 ± 11.36 | 22.18 ± 1.24 | 3.96 ± 0.01  | 9.01 ± 0.06  | 9.02 ± 0.06  |
| 1.87                    | 349.59 ± 0.72  | 37.68 ± 0.19 | 10.05 ± 0.04 | 10.01 ± 0.03 | 10.00 ± 0.01 |
| 2.5                     | 67.25 ± 4.05   | 7.25 ± 0.42  | 4.11 ± 0.02  | 6.83 ± 0.02  | 6.86 ± 0.04  |

|   |              |             |             |              |              |
|---|--------------|-------------|-------------|--------------|--------------|
| 4 | 31.50 ± 0.42 | 3.71 ± 0.04 | 0.96 ± 0.12 | 10.70 ± 0.67 | 10.70 ± 0.77 |
| 5 | 32.44 ± 1.85 | 3.83 ± 0.23 | 0.50 ± 0.00 | 13.97 ± 0.35 | 14.11 ± 0.12 |
| 6 | 25.67 ± 1.67 | 3.02 ± 0.14 | 0.50 ± 0.00 | 17.93 ± 0.06 | 17.90 ± 0.10 |

**Table S4.** Physical characterization of the printed tablets for the correlation generation with the PZQ-PVA formulation ( $n \geq 3$ ,  $x \pm s$ ).

| PZQ-PVA                 |                |              |             |              |              |
|-------------------------|----------------|--------------|-------------|--------------|--------------|
| SA/V / $\text{mm}^{-1}$ | mg Total       | mg API       | h / mm      | l / mm       | w / mm       |
| 0.8                     | 308.21 ± 11.73 | 14.85 ± 1.05 | 5.00 ± 0.08 | 10.22 ± 0.21 | 10.06 ± 0.04 |
| 1                       | 810.24 ± 16.81 | 32.32 ± 1.25 | 4.01 ± 0.04 | 8.40 ± 0.10  | 8.42 ± 0.08  |
| 1.5                     | 224.11 ± 17.60 | 11.03 ± 0.84 | 4.05 ± 0.07 | 10.11 ± 0.07 | 10.13 ± 0.03 |
| 2                       | 118.123 ± 7.67 | 5.56 ± 0.34  | 2.02 ± 0.02 | 10.04 ± 0.05 | 10.04 ± 0.04 |
| 2.5                     | 90.38 ± 3.76   | 4.47 ± 0.22  | 3.96 ± 0.04 | 7.20 ± 0.15  | 7.19 ± 0.07  |
| 3.33                    | 46.08 ± 1.15   | 2.11 ± 0.05  | 1.02 ± 0.03 | 15.01 ± 0.01 | 14.97 ± 0.11 |
| 4                       | 33.04 ± 0.54   | 1.37 ± 0.04  | 1.00 ± 0.03 | 10.02 ± 0.08 | 10.02 ± 0.07 |
| 5                       | 45.46 ± 0.17   | 1.97 ± 0.03  | 0.59 ± 0.05 | 17.98 ± 0.06 | 17.99 ± 0.04 |
| 6                       | 32.05 ± 0.27   | 1.11 ± 0.07  | 0.58 ± 0.03 | 19.97 ± 0.12 | 19.95 ± 0.04 |

**Table S5.** Physical characterization of the printed tablets for the prediction validation with the PDM-PVA formulation ( $n \geq 3$ ,  $x \pm s$ ).

| PDM-PVA                 |               |              |             |              |              |
|-------------------------|---------------|--------------|-------------|--------------|--------------|
| SA/V / $\text{mm}^{-1}$ | mg Total      | mg API       | h / mm      | l / mm       | w / mm       |
| 0.9                     | 294.00 ± 3.48 | 14.83 ± 0.20 | 4.90 ± 0.02 | 8.02 ± 0.01  | 8.00 ± 0.02  |
| 1.6                     | 163.14 ± 1.49 | 8.33 ± 0.07  | 2.41 ± 0.03 | 10.02 ± 0.03 | 9.99 ± 0.04  |
| 2.3                     | 103.20 ± 1.46 | 5.19 ± 0.06  | 2.00 ± 0.01 | 10.00 ± 0.01 | 10.01 ± 0.01 |
| 4.67                    | 39.54 ± 2.15  | 2.15 ± 0.14  | 0.59 ± 0.02 | 12.02 ± 0.04 | 12.03 ± 0.05 |

**Table S6.** Physical characterization of the printed tablets for the prediction validation with the LD-EVA formulation ( $n \geq 3$ ,  $x \pm s$ ).

| LD-EVA                  |               |              |             |              |              |
|-------------------------|---------------|--------------|-------------|--------------|--------------|
| SA/V / $\text{mm}^{-1}$ | mg Total      | mg API       | h / mm      | l / mm       | w / mm       |
| 1.73                    | 210.63 ± 6.46 | 22.71 ± 0.88 | 4.73 ± 0.21 | 10.12 ± 0.16 | 10.13 ± 0.18 |
| 1.89                    | 329.30 ± 5.04 | 34.53 ± 0.39 | 4.17 ± 0.06 | 11.83 ± 0.15 | 12.62 ± 0.37 |
| 4.67                    | 24.46 ± 0.41  | 2.93 ± 0.11  | 0.61 ± 0.02 | 11.98 ± 0.08 | 12.07 ± 0.16 |

**Table S7.** Physical characterization of the printed tablets for the prediction validation with the PZQ-PVA formulation ( $n \geq 3$ ,  $x \pm s$ ).

| PZQ-PVA                 |                |              |             |              |              |
|-------------------------|----------------|--------------|-------------|--------------|--------------|
| SA/V / $\text{mm}^{-1}$ | mg Total       | mg API       | h / mm      | l / mm       | w / mm       |
| 1.3                     | 281.393 ± 1.36 | 14.86 ± 0.09 | 6.96 ± 0.11 | 11.01 ± 0.08 | 11.02 ± 0.06 |
| 1.83                    | 186.42 ± 2.83  | 9.64 ± 0.20  | 4.01 ± 0.06 | 10.17 ± 0.07 | 10.14 ± 0.05 |
| 2.3                     | 100.98 ± 1.05  | 5.11 ± 0.04  | 1.99 ± 0.05 | 10.21 ± 0.01 | 10.20 ± 0.04 |
| 4.67                    | 41.92 ± 0.77   | 1.72 ± 0.03  | 0.59 ± 0.01 | 12.36 ± 0.13 | 12.39 ± 0.15 |
